# Supplementary material for: Evaluation of stem rot in 339 Bornean tree species: implications of size, taxonomy, and soil-related variation for aboveground biomass estimates
Source: Copernicus journal article supplement (doi:10.5194/bg-12-5735-2015), 2015-10-08

Supplement of Biogeosciences, 12, 5735–5751, 2015  
<http://www.biogeosciences.net/12/5735/2015/>  
doi:10.5194/bg-12-5735-2015-supplement  
© Author(s) 2015. CC Attribution 3.0 License.

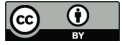

*Supplement of*

## **Evaluation of stem rot in 339 Bornean tree species: implications of size, taxonomy, and soil-related variation for aboveground biomass estimates**

**K. D. Heineman et al.**

*Correspondence to:* K. D. Heineman ([kheineman@life.illinois.edu](mailto:kheineman@life.illinois.edu))

The copyright of individual parts of the supplement might differ from the CC-BY 3.0 licence.

Table S1. Frequency and severity (mean percent rot) of stem rot for each species in the felling, drilling, and coring datasets with corresponding species covariates (wood density and soil habitat association). Percent rot was only evaluated in felled trees. Species habitat associations are abbreviated as follows. This list excludes morphospecies, which accounted for 21 of 339 species sampled at central Sarawak and Lambir. If no observations were recorded for a species in given column, the cell is marked “NA”.

| Family                                                                                       | Genus                    | Species             | Mean Percent Rot | Felling |     | Drilling |     | Coring  |     |
|----------------------------------------------------------------------------------------------|--------------------------|---------------------|------------------|---------|-----|----------|-----|---------|-----|
|                                                                                              |                          |                     |                  | Not Rot | Rot | Not Rot  | Rot | Not Rot | Rot |
| Trees Resolved to Species with Covariates Included in Generalized Linear Mixed Effect Models |                          |                     |                  |         |     |          |     |         |     |
| Alangiaceae                                                                                  | <i>Alangium</i>          | <i>javanicum</i>    | NA               | NA      | NA  | NA       | NA  | 1       | NA  |
| Anacardiaceae                                                                                | <i>Koordersiodendron</i> | <i>pinnatum</i>     | NA               | NA      | NA  | NA       | 2   | NA      | NA  |
| Anacardiaceae                                                                                | <i>Melanochyla</i>       | <i>elmeri</i>       | NA               | NA      | NA  | NA       | NA  | 1       | NA  |
| Anacardiaceae                                                                                | <i>Parishia</i>          | <i>insignis</i>     | 12.4             | NA      | 1   | NA       | NA  | NA      | NA  |
| Anacardiaceae                                                                                | <i>Parishia</i>          | <i>maingayi</i>     | 5.2              | NA      | 1   | 1        | NA  | NA      | NA  |
| Anacardiaceae                                                                                | <i>Parishia</i>          | <i>sericea</i>      | NA               | NA      | NA  | NA       | NA  | 1       | NA  |
| Anacardiaceae                                                                                | <i>Pentaspadon</i>       | <i>motleyi</i>      | 61.3             | NA      | 1   | NA       | NA  | 2       | NA  |
| Anacardiaceae                                                                                | <i>Swintonia</i>         | <i>spicifera</i>    | 0                | 2       | NA  | 4        | 1   | NA      | NA  |
| Anisophylleaceae                                                                             | <i>Anisophyllea</i>      | <i>corneri</i>      | NA               | NA      | NA  | NA       | NA  | 5       | NA  |
| Annonaceae                                                                                   | <i>Mezzettia</i>         | <i>macrocarpa</i>   | NA               | NA      | NA  | NA       | NA  | 1       | NA  |
| Annonaceae                                                                                   | <i>Polyalthia</i>        | <i>glabrescens</i>  | NA               | NA      | NA  | NA       | NA  | 2       | NA  |
| Annonaceae                                                                                   | <i>Polyalthia</i>        | <i>rumphii</i>      | NA               | NA      | NA  | NA       | NA  | 1       | NA  |
| Annonaceae                                                                                   | <i>Popowia</i>           | <i>pisocarpa</i>    | NA               | NA      | NA  | NA       | NA  | 1       | NA  |
| Annonaceae                                                                                   | <i>Pseuduvaria</i>       | <i>macrophylla</i>  | NA               | NA      | NA  | NA       | NA  | 2       | NA  |
| Aquifoliaceae                                                                                | <i>Ilex</i>              | <i>cymosa</i>       | NA               | NA      | NA  | NA       | NA  | 1       | NA  |
| Burseraceae                                                                                  | <i>Canarium</i>          | <i>apertum</i>      | 8.7              | NA      | 1   | NA       | 1   | NA      | NA  |
| Burseraceae                                                                                  | <i>Canarium</i>          | <i>denticulatum</i> | NA               | NA      | NA  | 1        | NA  | NA      | NA  |
| Burseraceae                                                                                  | <i>Dacryodes</i>         | <i>costata</i>      | 0                | 1       | NA  | 1        | NA  | NA      | NA  |
| Burseraceae                                                                                  | <i>Dacryodes</i>         | <i>incurvata</i>    | 0                | 5       | NA  | 4        | 3   | NA      | NA  |
| Burseraceae                                                                                  | <i>Dacryodes</i>         | <i>laxa</i>         | 0                | 1       | NA  | 1        | NA  | NA      | NA  |

|                  |                      |                     |      |    |    |    |    |    |    |
|------------------|----------------------|---------------------|------|----|----|----|----|----|----|
| Burseraceae      | <i>Santiria</i>      | <i>apiculata</i>    | NA   | NA | NA | 1  | 2  | NA | NA |
| Burseraceae      | <i>Santiria</i>      | <i>laevigata</i>    | 0    | 2  | NA | 6  | 3  | NA | 1  |
| Burseraceae      | <i>Santiria</i>      | <i>tomentosa</i>    | 1.4  | NA | 2  | NA | NA | NA | NA |
| Celastraceae     | <i>Bhesa</i>         | <i>paniculata</i>   | 19.7 | NA | 1  | NA | 1  | NA | NA |
| Chrysobalanaceae | <i>Parastemon</i>    | <i>urophyllum</i>   | 0.6  | 2  | 1  | NA | NA | NA | NA |
| Clusiaceae       | <i>Kayea</i>         | <i>racemosa</i>     | NA   | NA | NA | NA | NA | 6  | 1  |
| Dilleniaceae     | <i>Dillenia</i>      | <i>sumatrana</i>    | NA   | NA | NA | NA | NA | 1  | NA |
| Dipterocarpaceae | <i>Anisoptera</i>    | <i>costata</i>      | 0    | 1  | NA | NA | 1  | NA | NA |
| Dipterocarpaceae | <i>Anisoptera</i>    | <i>grossivenia</i>  | 0.7  | NA | 1  | 1  | 2  | 1  | NA |
| Dipterocarpaceae | <i>Anisoptera</i>    | <i>laevis</i>       | 35.5 | NA | 1  | 2  | 3  | NA | NA |
| Dipterocarpaceae | <i>Anisoptera</i>    | <i>marginata</i>    | 0.5  | NA | 2  | 1  | 3  | NA | NA |
| Dipterocarpaceae | <i>Coylelobium</i>   | <i>melanoxyton</i>  | NA   | NA | NA | 1  | NA | NA | NA |
| Dipterocarpaceae | <i>Dipterocarpus</i> | <i>acutangulus</i>  | 0.7  | 12 | 2  | 16 | 2  | NA | NA |
| Dipterocarpaceae | <i>Dipterocarpus</i> | <i>caudiferus</i>   | 0.5  | 15 | 5  | 48 | 6  | NA | NA |
| Dipterocarpaceae | <i>Dipterocarpus</i> | <i>confertus</i>    | 0    | 3  | NA | 3  | 2  | 1  | NA |
| Dipterocarpaceae | <i>Dipterocarpus</i> | <i>conformis</i>    | 0.9  | 6  | 1  | 13 | 1  | NA | NA |
| Dipterocarpaceae | <i>Dipterocarpus</i> | <i>crinitus</i>     | 0    | 2  | NA | NA | 4  | NA | NA |
| Dipterocarpaceae | <i>Dipterocarpus</i> | <i>geniculatus</i>  | 4    | 7  | 1  | 7  | 1  | NA | NA |
| Dipterocarpaceae | <i>Dipterocarpus</i> | <i>globosus</i>     | 0.5  | 9  | 2  | 2  | NA | 17 | NA |
| Dipterocarpaceae | <i>Dipterocarpus</i> | <i>gracilis</i>     | 0.2  | 3  | 1  | NA | NA | NA | NA |
| Dipterocarpaceae | <i>Dipterocarpus</i> | <i>humertus</i>     | 0    | 1  | NA | 3  | NA | NA | NA |
| Dipterocarpaceae | <i>Dipterocarpus</i> | <i>lowii</i>        | 0    | 3  | NA | 5  | 1  | NA | NA |
| Dipterocarpaceae | <i>Dipterocarpus</i> | <i>mundus</i>       | 0.3  | 5  | 1  | 8  | NA | NA | NA |
| Dipterocarpaceae | <i>Dipterocarpus</i> | <i>pachyphyllus</i> | 2.7  | 11 | 3  | 18 | 7  | NA | NA |
| Dipterocarpaceae | <i>Dipterocarpus</i> | <i>palembanicus</i> | 7.6  | NA | 1  | 2  | 1  | 3  | NA |
| Dipterocarpaceae | <i>Dipterocarpus</i> | <i>penangianus</i>  | 11.2 | 3  | 2  | 6  | 3  | NA | NA |
| Dipterocarpaceae | <i>Dipterocarpus</i> | <i>sarawakensis</i> | 0    | 4  | NA | 1  | 3  | NA | NA |
| Dipterocarpaceae | <i>Dipterocarpus</i> | <i>stellatus</i>    | 6.8  | 4  | 8  | 4  | 3  | NA | NA |
| Dipterocarpaceae | <i>Dipterocarpus</i> | <i>verrucosus</i>   | 1.4  | 2  | 1  | 1  | 2  | NA | NA |
| Dipterocarpaceae | <i>Dryobalanops</i>  | <i>aromatica</i>    | 10.9 | 9  | 38 | 31 | 48 | 15 | 1  |
| Dipterocarpaceae | <i>Dryobalanops</i>  | <i>beccarii</i>     | 8.4  | 5  | 6  | 11 | 9  | NA | NA |

|                  |                     |                        |      |    |    |    |    |    |    |
|------------------|---------------------|------------------------|------|----|----|----|----|----|----|
| Dipterocarpaceae | <i>Dryobalanops</i> | <i>lanceolata</i>      | 2.1  | 8  | 5  | 17 | 4  | 18 | 1  |
| Dipterocarpaceae | <i>Dryobalanops</i> | <i>oblongifolia</i>    | 8.2  | 28 | 48 | 25 | 62 | NA | NA |
| Dipterocarpaceae | <i>Hopea</i>        | <i>cernua</i>          | 0    | 1  | NA | 1  | NA | NA | NA |
| Dipterocarpaceae | <i>Hopea</i>        | <i>dryobalanooides</i> | 1.4  | NA | 1  | 1  | 1  | NA | NA |
| Dipterocarpaceae | <i>Hopea</i>        | <i>dyeri</i>           | 11.9 | 2  | 2  | 4  | 5  | NA | NA |
| Dipterocarpaceae | <i>Hopea</i>        | <i>fluvialis</i>       | 7.6  | NA | 1  | NA | NA | NA | NA |
| Dipterocarpaceae | <i>Hopea</i>        | <i>latifolia</i>       | NA   | NA | NA | 1  | NA | NA | NA |
| Dipterocarpaceae | <i>Hopea</i>        | <i>nervosa</i>         | NA   | NA | NA | NA | 1  | NA | NA |
| Dipterocarpaceae | <i>Hopea</i>        | <i>pachycarpa</i>      | 7.5  | 1  | 1  | NA | 1  | NA | NA |
| Dipterocarpaceae | <i>Hopea</i>        | <i>pterygota</i>       | NA   | NA | NA | NA | 1  | NA | NA |
| Dipterocarpaceae | <i>Parashorea</i>   | <i>macrophylla</i>     | 0    | 1  | NA | 6  | NA | NA | NA |
| Dipterocarpaceae | <i>Parashorea</i>   | <i>smythiesii</i>      | 9.8  | 5  | 11 | 10 | 2  | NA | NA |
| Dipterocarpaceae | <i>Shorea</i>       | <i>acuminatissima</i>  | 8    | 4  | 1  | NA | 5  | NA | NA |
| Dipterocarpaceae | <i>Shorea</i>       | <i>acuta</i>           | NA   | NA | NA | NA | NA | NA | 1  |
| Dipterocarpaceae | <i>Shorea</i>       | <i>agamii</i>          | 0    | 1  | NA | 1  | 1  | NA | NA |
| Dipterocarpaceae | <i>Shorea</i>       | <i>albida</i>          | 12.6 | NA | 1  | NA | 1  | NA | NA |
| Dipterocarpaceae | <i>Shorea</i>       | <i>amplexicaulis</i>   | 12.9 | 2  | 5  | 7  | 4  | NA | NA |
| Dipterocarpaceae | <i>Shorea</i>       | <i>andulensis</i>      | 24.3 | 1  | 6  | 3  | 4  | NA | NA |
| Dipterocarpaceae | <i>Shorea</i>       | <i>argentifolia</i>    | 6.5  | 3  | 2  | 7  | 5  | NA | NA |
| Dipterocarpaceae | <i>Shorea</i>       | <i>atrineriosa</i>     | 10.9 | 3  | 8  | 1  | 2  | NA | NA |
| Dipterocarpaceae | <i>Shorea</i>       | <i>beccariana</i>      | 5.2  | 13 | 5  | 11 | 12 | NA | NA |
| Dipterocarpaceae | <i>Shorea</i>       | <i>brunnescens</i>     | NA   | NA | NA | 3  | 2  | NA | NA |
| Dipterocarpaceae | <i>Shorea</i>       | <i>collaris</i>        | 19.7 | 8  | 21 | 20 | 29 | NA | NA |
| Dipterocarpaceae | <i>Shorea</i>       | <i>coriacea</i>        | 16.8 | NA | 1  | 1  | 2  | NA | NA |
| Dipterocarpaceae | <i>Shorea</i>       | <i>crassa</i>          | 1.6  | 2  | 2  | 2  | 1  | NA | NA |
| Dipterocarpaceae | <i>Shorea</i>       | <i>curtisii</i>        | 13   | NA | 1  | 4  | 2  | 1  | NA |
| Dipterocarpaceae | <i>Shorea</i>       | <i>dasyphylla</i>      | NA   | NA | NA | 2  | 1  | NA | NA |
| Dipterocarpaceae | <i>Shorea</i>       | <i>dolichocarpa</i>    | 13.4 | 4  | 4  | 5  | 9  | NA | NA |
| Dipterocarpaceae | <i>Shorea</i>       | <i>domatiosa</i>       | 9.8  | 1  | 3  | NA | 2  | NA | NA |
| Dipterocarpaceae | <i>Shorea</i>       | <i>elliptica</i>       | 3.3  | 1  | 1  | 3  | 1  | NA | NA |
| Dipterocarpaceae | <i>Shorea</i>       | <i>exelliptica</i>     | 21.3 | NA | 1  | 2  | NA | NA | NA |

|                  |               |                      |      |    |    |    |    |    |    |
|------------------|---------------|----------------------|------|----|----|----|----|----|----|
| Dipterocarpaceae | <i>Shorea</i> | <i>faguetiana</i>    | 9.5  | 3  | 4  | 4  | 7  | NA | NA |
| Dipterocarpaceae | <i>Shorea</i> | <i>faguetoides</i>   | 16.1 | 6  | 25 | 12 | 21 | NA | NA |
| Dipterocarpaceae | <i>Shorea</i> | <i>fallax</i>        | 2.2  | NA | 1  | 2  | 2  | NA | NA |
| Dipterocarpaceae | <i>Shorea</i> | <i>ferruginea</i>    | 18.8 | 3  | 7  | 6  | 17 | NA | NA |
| Dipterocarpaceae | <i>Shorea</i> | <i>flava</i>         | NA   | NA | NA | 2  | NA | NA | NA |
| Dipterocarpaceae | <i>Shorea</i> | <i>gibbosa</i>       | 0    | 1  | NA | NA | NA | NA | NA |
| Dipterocarpaceae | <i>Shorea</i> | <i>glaucescens</i>   | 11.5 | 1  | 1  | 3  | 1  | NA | NA |
| Dipterocarpaceae | <i>Shorea</i> | <i>havidandii</i>    | 3.7  | 1  | 3  | 1  | NA | NA | NA |
| Dipterocarpaceae | <i>Shorea</i> | <i>hopeifolia</i>    | 4.6  | NA | 1  | 1  | 3  | NA | NA |
| Dipterocarpaceae | <i>Shorea</i> | <i>iliasii</i>       | NA   | NA | NA | 1  | NA | NA | NA |
| Dipterocarpaceae | <i>Shorea</i> | <i>kunstleri</i>     | 0.8  | 1  | 1  | 6  | 1  | NA | NA |
| Dipterocarpaceae | <i>Shorea</i> | <i>laevis</i>        | 19.7 | NA | 8  | 2  | 3  | NA | NA |
| Dipterocarpaceae | <i>Shorea</i> | <i>lamellata</i>     | 0    | 1  | NA | 1  | 4  | NA | NA |
| Dipterocarpaceae | <i>Shorea</i> | <i>laxa</i>          | NA   | NA | NA | NA | NA | 5  | 2  |
| Dipterocarpaceae | <i>Shorea</i> | <i>leprosula</i>     | 4.7  | 1  | 1  | 1  | 1  | NA | NA |
| Dipterocarpaceae | <i>Shorea</i> | <i>macrantha</i>     | NA   | NA | NA | 1  | 1  | NA | NA |
| Dipterocarpaceae | <i>Shorea</i> | <i>macroptera</i>    | 7.5  | 8  | 7  | 7  | 6  | 3  | NA |
| Dipterocarpaceae | <i>Shorea</i> | <i>maxwelliana</i>   | 10.9 | NA | 3  | NA | NA | NA | NA |
| Dipterocarpaceae | <i>Shorea</i> | <i>mecistopteryx</i> | 8    | 4  | 2  | 4  | NA | NA | 1  |
| Dipterocarpaceae | <i>Shorea</i> | <i>multiflora</i>    | 4.9  | NA | 1  | 2  | 5  | NA | NA |
| Dipterocarpaceae | <i>Shorea</i> | <i>myrionerva</i>    | 30.3 | 2  | 9  | 14 | 11 | NA | NA |
| Dipterocarpaceae | <i>Shorea</i> | <i>nitens</i>        | NA   | NA | NA | 1  | NA | NA | NA |
| Dipterocarpaceae | <i>Shorea</i> | <i>ochracea</i>      | 6    | 1  | 2  | 3  | 4  | 1  | NA |
| Dipterocarpaceae | <i>Shorea</i> | <i>ovalis</i>        | 15.3 | 1  | 1  | 2  | 1  | NA | NA |
| Dipterocarpaceae | <i>Shorea</i> | <i>ovata</i>         | 47.7 | NA | 1  | NA | 2  | 1  | 1  |
| Dipterocarpaceae | <i>Shorea</i> | <i>pachyphylla</i>   | 8.5  | 1  | 1  | NA | 1  | NA | NA |
| Dipterocarpaceae | <i>Shorea</i> | <i>palembanica</i>   | 2.5  | 2  | 2  | 2  | 1  | NA | NA |
| Dipterocarpaceae | <i>Shorea</i> | <i>parvifolia</i>    | 9.4  | 31 | 37 | 51 | 24 | 7  | 1  |
| Dipterocarpaceae | <i>Shorea</i> | <i>patoiensis</i>    | NA   | NA | NA | NA | NA | 5  | 1  |
| Dipterocarpaceae | <i>Shorea</i> | <i>pauciflora</i>    | 9    | 1  | 5  | 12 | 4  | NA | NA |
| Dipterocarpaceae | <i>Shorea</i> | <i>pilosa</i>        | 3.7  | NA | 2  | 1  | 3  | NA | NA |

|                  |                        |                      |      |    |    |    |    |    |    |
|------------------|------------------------|----------------------|------|----|----|----|----|----|----|
| Dipterocarpaceae | <i>Shorea</i>          | <i>pinanga</i>       | 18.8 | 5  | 9  | 19 | 17 | NA | NA |
| Dipterocarpaceae | <i>Shorea</i>          | <i>platyclados</i>   | 49.2 | NA | 1  | NA | 2  | NA | NA |
| Dipterocarpaceae | <i>Shorea</i>          | <i>praestans</i>     | 30.1 | 2  | 3  | NA | NA | NA | NA |
| Dipterocarpaceae | <i>Shorea</i>          | <i>pubistyla</i>     | NA   | NA | NA | NA | NA | 2  | NA |
| Dipterocarpaceae | <i>Shorea</i>          | <i>quadrinervis</i>  | 29.5 | 2  | 6  | 3  | 13 | 1  | NA |
| Dipterocarpaceae | <i>Shorea</i>          | <i>resina-negra</i>  | 44.9 | NA | 1  | 1  | 1  | NA | NA |
| Dipterocarpaceae | <i>Shorea</i>          | <i>rubella</i>       | NA   | NA | NA | 1  | NA | NA | NA |
| Dipterocarpaceae | <i>Shorea</i>          | <i>rubra</i>         | 9.3  | 5  | 16 | 21 | 29 | NA | NA |
| Dipterocarpaceae | <i>Shorea</i>          | <i>rugosa</i>        | 0    | 1  | NA | 2  | 1  | NA | NA |
| Dipterocarpaceae | <i>Shorea</i>          | <i>sagittata</i>     | 9.8  | 19 | 15 | 33 | 44 | NA | NA |
| Dipterocarpaceae | <i>Shorea</i>          | <i>scaberrima</i>    | 11.7 | 8  | 10 | 7  | 10 | NA | NA |
| Dipterocarpaceae | <i>Shorea</i>          | <i>scrobiculata</i>  | NA   | NA | NA | NA | NA | 8  | 1  |
| Dipterocarpaceae | <i>Shorea</i>          | <i>slootenii</i>     | 33.1 | NA | 4  | NA | 7  | NA | NA |
| Dipterocarpaceae | <i>Shorea</i>          | <i>smithiana</i>     | NA   | NA | NA | 1  | NA | 3  | 1  |
| Dipterocarpaceae | <i>Shorea</i>          | <i>superba</i>       | 0.6  | 2  | 2  | 7  | 2  | NA | NA |
| Dipterocarpaceae | <i>Shorea</i>          | <i>virescens</i>     | 0    | 3  | NA | 6  | 1  | NA | NA |
| Dipterocarpaceae | <i>Shorea</i>          | <i>xanthophylla</i>  | 0    | 1  | NA | NA | NA | NA | NA |
| Dipterocarpaceae | <i>Upuna</i>           | <i>borneensis</i>    | 1.8  | NA | 1  | NA | NA | NA | NA |
| Dipterocarpaceae | <i>Vatica</i>          | <i>badiifolia</i>    | NA   | NA | NA | NA | NA | 1  | 1  |
| Dipterocarpaceae | <i>Vatica</i>          | <i>borneensis</i>    | 0    | 1  | NA | NA | NA | NA | NA |
| Dipterocarpaceae | <i>Vatica</i>          | <i>micrantha</i>     | NA   | NA | NA | NA | NA | 20 | 3  |
| Dipterocarpaceae | <i>Vatica</i>          | <i>nitens</i>        | 0    | 1  | NA | NA | NA | NA | NA |
| Dipterocarpaceae | <i>Vatica</i>          | <i>oblongifolia</i>  | 15.5 | NA | 1  | NA | NA | NA | NA |
| Dipterocarpaceae | <i>Vatica</i>          | <i>vinosa</i>        | 1.3  | NA | 3  | 4  | 2  | NA | NA |
| Ebenaceae        | <i>Diospyros</i>       | <i>dictyoneura</i>   | NA   | NA | NA | NA | NA | 1  | NA |
| Ebenaceae        | <i>Diospyros</i>       | <i>diepenhorstii</i> | NA   | NA | NA | NA | NA | 1  | NA |
| Ebenaceae        | <i>Diospyros</i>       | <i>mindanensis</i>   | NA   | NA | NA | NA | NA | 2  | NA |
| Ebenaceae        | <i>Diospyros</i>       | <i>sarawakana</i>    | NA   | NA | NA | NA | NA | 1  | NA |
| Ebenaceae        | <i>Diospyros</i>       | <i>sumatrana</i>     | NA   | NA | NA | NA | NA | 1  | NA |
| Ebenaceae        | <i>Tabernaemontana</i> | <i>macrocarpa</i>    | NA   | NA | NA | NA | NA | 2  | NA |
| Euphorbiaceae    | <i>Blumeodendron</i>   | <i>kurzii</i>        | 0.8  | 3  | 2  | 3  | NA | NA | NA |

|                |                       |                       |      |    |    |    |    |    |    |
|----------------|-----------------------|-----------------------|------|----|----|----|----|----|----|
| Euphorbiaceae  | <i>Cephalomappa</i>   | <i>beccariana</i>     | NA   | NA | NA | NA | NA | 1  | NA |
| Euphorbiaceae  | <i>Cleistanthus</i>   | <i>myrianthus</i>     | 40   | NA | 2  | 1  | 2  | NA | NA |
| Euphorbiaceae  | <i>Macaranga</i>      | <i>bancana</i>        | NA   | NA | NA | NA | NA | 1  | NA |
| Euphorbiaceae  | <i>Macaranga</i>      | <i>beccariana</i>     | NA   | NA | NA | NA | NA | 18 | NA |
| Euphorbiaceae  | <i>Macaranga</i>      | <i>brevipetiolata</i> | NA   | NA | NA | NA | NA | 6  | NA |
| Euphorbiaceae  | <i>Macaranga</i>      | <i>gigantea</i>       | NA   | NA | NA | NA | NA | 5  | 1  |
| Euphorbiaceae  | <i>Macaranga</i>      | <i>havidandii</i>     | NA   | NA | NA | NA | NA | 3  | NA |
| Euphorbiaceae  | <i>Macaranga</i>      | <i>hosei</i>          | NA   | NA | NA | NA | NA | 3  | 1  |
| Euphorbiaceae  | <i>Macaranga</i>      | <i>hullettii</i>      | NA   | NA | NA | NA | NA | 3  | NA |
| Euphorbiaceae  | <i>Macaranga</i>      | <i>hypoleuca</i>      | NA   | NA | NA | NA | NA | 3  | NA |
| Euphorbiaceae  | <i>Macaranga</i>      | <i>lamellata</i>      | NA   | NA | NA | NA | NA | 11 | NA |
| Euphorbiaceae  | <i>Macaranga</i>      | <i>praestans</i>      | NA   | NA | NA | NA | NA | 3  | NA |
| Euphorbiaceae  | <i>Macaranga</i>      | <i>recurvata</i>      | NA   | NA | NA | NA | NA | 2  | NA |
| Euphorbiaceae  | <i>Macaranga</i>      | <i>trachyphylla</i>   | NA   | NA | NA | NA | NA | 4  | NA |
| Euphorbiaceae  | <i>Macaranga</i>      | <i>triloba</i>        | NA   | NA | NA | NA | NA | 7  | NA |
| Euphorbiaceae  | <i>Macaranga</i>      | <i>umbrosa</i>        | NA   | NA | NA | NA | NA | 4  | NA |
| Euphorbiaceae  | <i>Macaranga</i>      | <i>winkleri</i>       | NA   | NA | NA | NA | NA | 11 | NA |
| Euphorbiaceae  | <i>Moultonianthus</i> | <i>leembruggianus</i> | NA   | NA | NA | NA | NA | 1  | 1  |
| Euphorbiaceae  | <i>Pimelodendron</i>  | <i>griffithianum</i>  | NA   | NA | NA | NA | NA | 1  | NA |
| Euphorbiaceae  | <i>Ptychopyxis</i>    | <i>glochidiifolia</i> | NA   | NA | NA | NA | NA | 1  | NA |
| Euphorbiaceae  | <i>Trigonostemon</i>  | <i>capillipes</i>     | NA   | NA | NA | NA | NA | 1  | NA |
| Fabaceae       | <i>Dialium</i>        | <i>indum</i>          | 10.6 | NA | 1  | NA | NA | 6  | NA |
| Fabaceae       | <i>Koompassia</i>     | <i>excelsa</i>        | 0.2  | NA | 1  | 2  | 1  | 3  | NA |
| Fabaceae       | <i>Koompassia</i>     | <i>malaccensis</i>    | 5.7  | 4  | 4  | 2  | NA | NA | NA |
| Fabaceae       | <i>Millettia</i>      | <i>chaperi</i>        | 0    | 1  | NA | 2  | NA | NA | NA |
| Fabaceae       | <i>Parkia</i>         | <i>speciosa</i>       | NA   | NA | NA | 1  | NA | 4  | NA |
| Fabaceae       | <i>Sindora</i>        | <i>beccariana</i>     | 12.3 | 2  | 1  | 5  | 1  | NA | NA |
| Fabaceae       | <i>Sindora</i>        | <i>leiocarpa</i>      | 0.4  | NA | 1  | 5  | 1  | NA | NA |
| Fagaceae       | <i>Lithocarpus</i>    | <i>bennettii</i>      | 0    | 1  | NA | NA | NA | NA | NA |
| Fagaceae       | <i>Lithocarpus</i>    | <i>leptogyne</i>      | NA   | NA | NA | NA | NA | NA | 1  |
| Flacourtiaceae | <i>Hydnocarpus</i>    | <i>woodii</i>         | 0    | 4  | NA | 5  | NA | NA | NA |

|               |                       |                      |     |    |    |    |    |    |    |
|---------------|-----------------------|----------------------|-----|----|----|----|----|----|----|
| Hypericaceae  | <i>Cratoxylum</i>     | <i>arboresecens</i>  | 4.2 | 11 | 23 | 2  | NA | NA | NA |
| Hypericaceae  | <i>Cratoxylum</i>     | <i>formosum</i>      | 2   | NA | 1  | NA | NA | NA | NA |
| Hypericaceae  | <i>Cratoxylum</i>     | <i>glaucum</i>       | NA  | NA | NA | 4  | NA | NA | NA |
| Ixonanthaceae | <i>Allantospermum</i> | <i>borneense</i>     | NA  | NA | NA | NA | NA | 7  | NA |
| Juglandaceae  | <i>Engelhardtia</i>   | <i>rigida</i>        | NA  | NA | NA | NA | NA | 1  | NA |
| Lauraceae     | <i>Actinodaphne</i>   | <i>glomerata</i>     | NA  | NA | NA | NA | NA | 1  | NA |
| Lauraceae     | <i>Alseodaphne</i>    | <i>bancana</i>       | NA  | NA | NA | NA | NA | 1  | NA |
| Lauraceae     | <i>Cryptocarya</i>    | <i>crassinervia</i>  | 0   | 2  | NA | NA | NA | NA | NA |
| Lauraceae     | <i>Endiandra</i>      | <i>clavigera</i>     | NA  | NA | NA | NA | NA | 2  | NA |
| Lauraceae     | <i>Eusideroxylon</i>  | <i>malagangai</i>    | NA  | NA | NA | NA | NA | 3  | NA |
| Lauraceae     | <i>Litsea</i>         | <i>machilifolia</i>  | 3   | 1  | 1  | 2  | 1  | NA | NA |
| Lauraceae     | <i>Phoebe</i>         | <i>macrophylla</i>   | 0   | 1  | NA | NA | NA | NA | NA |
| Lecythidaceae | <i>Barringtonia</i>   | <i>curranii</i>      | NA  | NA | NA | NA | NA | 1  | NA |
| Malvaceae     | <i>Durio</i>          | <i>cf. oblongus</i>  | NA  | NA | NA | NA | NA | 1  | NA |
| Malvaceae     | <i>Durio</i>          | <i>oxleyanus</i>     | NA  | NA | NA | NA | NA | 1  | NA |
| Malvaceae     | <i>Heritiera</i>      | <i>simplicifolia</i> | NA  | NA | NA | 1  | NA | NA | NA |
| Malvaceae     | <i>Microcos</i>       | <i>blattaefolia</i>  | NA  | NA | NA | NA | NA | 1  | NA |
| Moraceae      | <i>Artocarpus</i>     | <i>anisophyllus</i>  | 1   | 4  | 1  | 4  | 2  | NA | NA |
| Moraceae      | <i>Artocarpus</i>     | <i>elasticus</i>     | NA  | NA | NA | 4  | 1  | NA | NA |
| Moraceae      | <i>Artocarpus</i>     | <i>odoratissimus</i> | 0.8 | NA | 1  | NA | NA | NA | NA |
| Myristicaceae | <i>Gymnacranthera</i> | <i>eugenifolia</i>   | NA  | NA | NA | NA | NA | 1  | NA |
| Myristicaceae | <i>Gymnacranthera</i> | <i>forbesii</i>      | 0   | 2  | NA | 2  | NA | 1  | NA |
| Myristicaceae | <i>Horsfieldia</i>    | <i>wallichii</i>     | NA  | NA | NA | NA | NA | 2  | NA |
| Myristicaceae | <i>Knema</i>          | <i>ashtonii</i>      | NA  | NA | NA | NA | NA | 3  | NA |
| Myristicaceae | <i>Knema</i>          | <i>conferta</i>      | NA  | NA | NA | 2  | NA | NA | NA |
| Myristicaceae | <i>Knema</i>          | <i>elmeri</i>        | NA  | NA | NA | NA | NA | 8  | NA |
| Myristicaceae | <i>Knema</i>          | <i>laurina</i>       | NA  | NA | NA | NA | NA | 1  | NA |
| Myristicaceae | <i>Myristica</i>      | <i>borneensis</i>    | NA  | NA | NA | NA | NA | 1  | NA |
| Myristicaceae | <i>Myristica</i>      | <i>lowiana</i>       | NA  | NA | NA | NA | NA | 1  | NA |
| Myrtaceae     | <i>Syzygium</i>       | <i>cf. grande</i>    | NA  | NA | NA | NA | NA | NA | 1  |
| Myrtaceae     | <i>Tristaniopsis</i>  | <i>whiteana</i>      | NA  | NA | NA | 2  | 1  | NA | NA |



|                                                                            |                           |                           |            |            |            |            |            |            |           |
|----------------------------------------------------------------------------|---------------------------|---------------------------|------------|------------|------------|------------|------------|------------|-----------|
| Olacaceae                                                                  | <i>Ochanostachys</i>      | <i>amentacea</i>          | 14.3       | NA         | 1          | 1          | 1          | NA         | NA        |
| Olacaceae                                                                  | <i>Scorodocarpus</i>      | <i>borneensis</i>         | 15.7       | 1          | 2          | 1          | 1          | 1          | NA        |
| Phyllanthaceae                                                             | <i>Aporusa</i>            | <i>bulattissima</i>       | NA         | NA         | NA         | NA         | NA         | 1          | NA        |
| Phyllanthaceae                                                             | <i>Baccaurea</i>          | <i>puberula</i>           | NA         | NA         | NA         | NA         | NA         | 1          | NA        |
| Phyllanthaceae                                                             | <i>Baccaurea</i>          | <i>sarawakensis</i>       | NA         | NA         | NA         | NA         | NA         | 6          | NA        |
| Putranjivaceae                                                             | <i>Drypetes</i>           | <i>sibuyanensis</i>       | NA         | NA         | NA         | NA         | NA         | 2          | NA        |
| Santalaceae                                                                | <i>Strombosia</i>         | <i>ceylanica</i>          | NA         | NA         | NA         | NA         | NA         | 1          | NA        |
| Sapindaceae                                                                | <i>Pometia</i>            | <i>pinnata</i>            | NA         | NA         | NA         | 3          | 2          | 1          | NA        |
| Sapotaceae                                                                 | <i>Madhuca</i>            | <i>malaccensis</i>        | NA         | NA         | NA         | NA         | NA         | 2          | NA        |
| Sapotaceae                                                                 | <i>Palaquium</i>          | <i>cryptocaryiifolium</i> | NA         | NA         | NA         | NA         | NA         | 1          | NA        |
| Sapotaceae                                                                 | <i>Palaquium</i>          | <i>dasyphyllum</i>        | 7.4        | NA         | 1          | NA         | NA         | NA         | NA        |
| Sapotaceae                                                                 | <i>Palaquium</i>          | <i>rostratum</i>          | 0          | 2          | NA         | 2          | NA         | NA         | NA        |
| Simaroubaceae                                                              | <i>Quassia</i>            | <i>borneensis</i>         | NA         | NA         | NA         | NA         | NA         | 1          | 1         |
| Malvaceae                                                                  | <i>Scaphium</i>           | <i>borneensis</i>         | NA         | NA         | NA         | NA         | NA         | NA         | 1         |
| Malvaceae                                                                  | <i>Sterculia</i>          | <i>hosei</i>              | NA         | NA         | NA         | NA         | NA         | 1          | NA        |
| Thymelaeaceae                                                              | <i>Aquilaria</i>          | <i>beccariana</i>         | NA         | NA         | NA         | NA         | NA         | 1          | NA        |
| Thymelaeaceae                                                              | <i>Gonystylus</i>         | <i>affinis</i>            | 0          | 1          | NA         | NA         | NA         | NA         | NA        |
| Malvaceae                                                                  | <i>Schoutenia</i>         | <i>glomerata</i>          | NA         | NA         | NA         | NA         | NA         | 1          | NA        |
| Trigonaceae                                                                | <i>Trigonistrum</i>       | <i>hypoleucum</i>         | NA         | NA         | NA         | NA         | NA         | 1          | NA        |
| Ulmaceae                                                                   | <i>Girroniera</i>         | <i>nervosa</i>            | 0          | 1          | NA         | 1          | NA         | NA         | NA        |
| Ulmaceae                                                                   | <i>Girroniera</i>         | <i>subaequalis</i>        | 0          | 1          | NA         | NA         | NA         | NA         | NA        |
| Verbenaceae                                                                | <i>Teijsmanniodendron</i> | <i>hollrungii</i>         | NA         | NA         | NA         | NA         | NA         | 1          | NA        |
| Verbenaceae                                                                | <i>Teijsmanniodendron</i> | <i>simplicifolium</i>     | NA         | NA         | NA         | NA         | NA         | 4          | 2         |
| <b>TOTAL</b>                                                               |                           |                           | <b>8.3</b> | <b>368</b> | <b>455</b> | <b>644</b> | <b>541</b> | <b>311</b> | <b>26</b> |
| Trees Resolved to Species but Without One or Both Species-level Covariates |                           |                           |            |            |            |            |            |            |           |
| Anacardiaceae                                                              | <i>Camposperma</i>        | <i>auriculata</i>         | 0          | 1          | NA         | NA         | NA         | NA         | NA        |
| Anacardiaceae                                                              | <i>Gluta</i>              | <i>laxiflora</i>          | NA         | NA         | NA         | 2          | NA         | 4          | NA        |
| Anacardiaceae                                                              | <i>Mangifera</i>          | <i>havilandii</i>         | 14.7       | NA         | 2          | NA         | 1          | NA         | NA        |
| Anacardiaceae                                                              | <i>Melanorrhoea</i>       | <i>beccarii</i>           | NA         | NA         | NA         | NA         | 1          | NA         | NA        |
| Anacardiaceae                                                              | <i>Melanorrhoea</i>       | <i>maingayi</i>           | NA         | NA         | NA         | NA         | 1          | NA         | NA        |

|                  |                        |                        |      |    |    |    |    |    |    |
|------------------|------------------------|------------------------|------|----|----|----|----|----|----|
| Anacardiaceae    | <i>Melanorrhoea</i>    | <i>pubescens</i>       | NA   | NA | NA | 3  | NA | NA | NA |
| Anacardiaceae    | <i>Nothopegia</i>      | <i>borneensis</i>      | 2.1  | NA | 1  | NA | NA | NA | NA |
| Anacardiaceae    | <i>Swintonia</i>       | <i>acuta</i>           | 0    | 1  | NA | NA | NA | NA | NA |
| Anacardiaceae    | <i>Swintonia</i>       | <i>schwenkii</i>       | 0    | 1  | NA | 2  | NA | NA | NA |
| Annonaceae       | <i>Mezzettia</i>       | <i>leptopoda</i>       | 0    | 3  | NA | 2  | 1  | NA | NA |
| Apocynaceae      | <i>Alstonia</i>        | <i>spatulata</i>       | 0    | 1  | NA | NA | NA | NA | NA |
| Apocynaceae      | <i>Dyera</i>           | <i>costulata</i>       | 0    | 3  | NA | 4  | 1  | NA | NA |
| Burseraceae      | <i>Canarium</i>        | <i>asperum</i>         | 8.7  | NA | 2  | 1  | NA | NA | NA |
| Burseraceae      | <i>Dacryodes</i>       | <i>expansa</i>         | 0    | 1  | NA | NA | 1  | 4  | 4  |
| Burseraceae      | <i>Santiria</i>        | <i>grandiflora</i>     | 2.1  | 4  | 2  | 9  | 3  | NA | NA |
| Burseraceae      | <i>Santiria</i>        | <i>mollis</i>          | 0    | 1  | NA | 3  | 2  | NA | NA |
| Dipterocarpaceae | <i>Dipterocarpus</i>   | <i>eurynchus</i>       | NA   | NA | NA | 4  | NA | NA | NA |
| Dipterocarpaceae | <i>Shorea</i>          | <i>asahi</i>           | 14.8 | NA | 2  | 1  | 2  | NA | NA |
| Dipterocarpaceae | <i>Shorea</i>          | <i>borneensis</i>      | NA   | NA | NA | 1  | NA | NA | NA |
| Dipterocarpaceae | <i>Shorea</i>          | <i>cristata</i>        | 41.9 | NA | 2  | 3  | 1  | NA | NA |
| Dipterocarpaceae | <i>Shorea</i>          | <i>macrobalanos</i>    | 7.1  | 1  | 2  | NA | NA | NA | NA |
| Dipterocarpaceae | <i>Shorea</i>          | <i>macrophylla</i>     | 13   | NA | 3  | 7  | 3  | 8  | NA |
| Dipterocarpaceae | <i>Shorea</i>          | <i>scabrida</i>        | 9.8  | 2  | 5  | 8  | 3  | NA | NA |
| Euphorbiaceae    | <i>Elateriospermum</i> | <i>tapos</i>           | 2.5  | 10 | 3  | 12 | 4  | 1  | NA |
| Euphorbiaceae    | <i>Macaranga</i>       | <i>conifera</i>        | 2.4  | NA | 2  | NA | NA | 3  | NA |
| Euphorbiaceae    | <i>Macaranga</i>       | <i>pruinosa</i>        | NA   | NA | NA | 1  | NA | NA | NA |
| Euphorbiaceae    | <i>Mallotus</i>        | <i>wrayii</i>          | 1.2  | 3  | 1  | 3  | NA | NA | NA |
| Fabaceae         | <i>Dialium</i>         | <i>procerum</i>        | NA   | NA | NA | 4  | 1  | NA | NA |
| Fabaceae         | <i>Millettia</i>       | <i>vasta</i>           | 0    | 3  | NA | 3  | 4  | 3  | 2  |
| Fabaceae         | <i>Sindora</i>         | <i>affinis</i>         | 0    | 2  | NA | 4  | NA | NA | NA |
| Fagaceae         | <i>Castanopsis</i>     | <i>costata</i>         | 0    | 1  | NA | NA | NA | NA | NA |
| Fagaceae         | <i>Castanopsis</i>     | <i>oviformis</i>       | 0    | 1  | NA | 1  | 1  | NA | NA |
| Fagaceae         | <i>Hydnocarpus</i>     | <i>calophylla</i>      | 0    | 3  | NA | NA | NA | NA | NA |
| Fagaceae         | <i>Lithocarpus</i>     | <i>echinifer</i>       | 6.9  | NA | 1  | 1  | NA | NA | NA |
| Fagaceae         | <i>Lithocarpus</i>     | <i>pseudokunsterli</i> | 79   | NA | 1  | NA | NA | NA | NA |
| Fagaceae         | <i>Lithocarpus</i>     | <i>pulcher</i>         | NA   | NA | NA | NA | 1  | NA | NA |

|                |                       |                               |      |    |    |    |    |    |    |
|----------------|-----------------------|-------------------------------|------|----|----|----|----|----|----|
| Fagaceae       | <i>Lithocarpus</i>    | <i>revolutus</i>              | 0    | 1  | NA | 1  | NA | NA | NA |
| Fagaceae       | <i>Quercus</i>        | <i>elmeri</i>                 | 0    | 1  | NA | NA | NA | NA | NA |
| Fagaceae       | <i>Quercus</i>        | <i>subsericea</i>             | 43   | NA | 1  | NA | NA | NA | NA |
| Lauraceae      | <i>Alseodaphne</i>    | <i>oblanceolata</i>           | NA   | NA | NA | 1  | NA | NA | NA |
| Lauraceae      | <i>Beilschmiedia</i>  | <i>perakensis</i>             | 0.1  | 1  | 1  | 2  | 2  | NA | NA |
| Lauraceae      | <i>Eusideroxylon</i>  | <i>zwageri</i>                | NA   | NA | NA | 2  | 5  | NA | NA |
| Lauraceae      | <i>Litsea</i>         | <i>ficoidea</i>               | 0    | 2  | NA | 3  | 1  | NA | NA |
| Lauraceae      | <i>Litsea</i>         | <i>nodularis</i>              | 5.4  | 2  | 1  | 2  | NA | NA | NA |
| Lauraceae      | <i>Litsea</i>         | <i>ochracea</i>               | 11.2 | NA | 2  | NA | 1  | NA | NA |
| Lauraceae      | <i>Litsea</i>         | <i>petiolata</i>              | 0.7  | NA | 1  | NA | NA | NA | NA |
| Lauraceae      | <i>Litsea</i>         | <i>varians</i>                | NA   | NA | NA | 1  | NA | NA | NA |
| Lecythidaceae  | <i>Barringtonia</i>   | <i>hallieri</i>               | NA   | NA | NA | 1  | NA | NA | NA |
| Lecythidaceae  | <i>Barringtonia</i>   | <i>sarcostachys</i>           | 0    | 2  | NA | NA | NA | NA | NA |
| Magnoliaceae   | <i>Talauma</i>        | <i>gigantifolia</i>           | 0    | 1  | NA | NA | NA | NA | NA |
| Malvaceae      | <i>Durio</i>          | <i>dulcis</i>                 | NA   | NA | NA | 1  | NA | NA | NA |
| Malvaceae      | <i>Durio</i>          | <i>lanceolatus</i>            | 0    | 1  | NA | 4  | NA | NA | NA |
| Malvaceae      | <i>Heritiera</i>      | <i>albiflora</i>              | 39.5 | NA | 1  | NA | NA | NA | NA |
| Malvaceae      | <i>Heritiera</i>      | <i>aurea</i>                  | 0    | 1  | NA | NA | 2  | NA | NA |
| Meliaceae      | <i>Aglaiia</i>        | <i>affinis</i>                | NA   | NA | NA | 1  | NA | NA | NA |
| Moraceae       | <i>Artocarpus</i>     | <i>nitidus</i>                | NA   | NA | NA | NA | 1  | NA | NA |
| Moraceae       | <i>Parartocarpus</i>  | <i>bracteata</i>              | 1.1  | NA | 1  | 1  | NA | NA | NA |
| Moraceae       | <i>Parartocarpus</i>  | <i>venenosus_ssp_born</i>     | 0    | 1  | NA | 2  | 1  | NA | NA |
| Moraceae       | <i>Parartocarpus</i>  | <i>venenosus_ssp_forbesii</i> | 3.4  | NA | 1  | NA | NA | NA | NA |
| Myristicaceae  | <i>Gymnacranthera</i> | <i>contracta</i>              | 5.8  | 3  | 3  | 1  | 1  | NA | NA |
| Myristicaceae  | <i>Knema</i>          | <i>galeata</i>                | 20   | 1  | 1  | 4  | 1  | 5  | NA |
| Myristicaceae  | <i>Knema</i>          | <i>latericia</i>              | 6.7  | 1  | 1  | NA | NA | 5  | NA |
| Myristicaceae  | <i>Knema</i>          | <i>nemacineriae</i>           | 7.5  | NA | 2  | 1  | 2  | NA | NA |
| Myristicaceae  | <i>Myristica</i>      | <i>maxima</i>                 | 0.2  | 6  | 1  | 13 | NA | NA | NA |
| Myristicaceae  | <i>Myristica</i>      | <i>papyracea</i>              | NA   | NA | NA | 1  | NA | NA | NA |
| Myristicaceae  | <i>Myristica</i>      | <i>villosa</i>                | NA   | NA | NA | 2  | NA | NA | NA |
| Phyllanthaceae | <i>Aporusa</i>        | <i>chalocarpa</i>             | 0    | 1  | NA | NA | 1  | NA | NA |

|                |                           |                      |            |           |           |            |           |           |          |
|----------------|---------------------------|----------------------|------------|-----------|-----------|------------|-----------|-----------|----------|
| Phyllanthaceae | <i>Aporusa</i>            | <i>subcaudata</i>    | 0.5        | NA        | 1         | 1          | NA        | NA        | NA       |
| Phyllanthaceae | <i>Baccaurea</i>          | <i>dolichobotrys</i> | 0.1        | NA        | 1         | 2          | NA        | NA        | NA       |
| Phyllanthaceae | <i>Baccaurea</i>          | <i>pyriformis</i>    | 18.6       | NA        | 1         | NA         | NA        | 1         | NA       |
| Polygalaceae   | <i>Xanthophyllum</i>      | <i>ellipticum</i>    | 0          | 1         | NA        | NA         | NA        | NA        | NA       |
| Sapindaceae    | <i>Nephelium</i>          | <i>rubescens</i>     | 0          | 1         | NA        | 1          | NA        | NA        | NA       |
| Sapotaceae     | <i>Palaquium</i>          | <i>decurrens</i>     | 0          | 2         | NA        | 3          | NA        | NA        | NA       |
| Sapotaceae     | <i>Palaquium</i>          | <i>obovatum</i>      | 1          | NA        | 1         | NA         | 1         | NA        | NA       |
| Sapotaceae     | <i>Palaquium</i>          | <i>rivulare</i>      | 13.7       | NA        | 1         | 1          | NA        | NA        | NA       |
| Sapotaceae     | <i>Palaquium</i>          | <i>stenophyllum</i>  | 0          | 1         | NA        | 3          | NA        | NA        | NA       |
| Sapotaceae     | <i>Payena</i>             | <i>endertii</i>      | NA         | NA        | NA        | 1          | NA        | NA        | NA       |
| Malvaceae      | <i>Scaphium</i>           | <i>longipetiolum</i> | 14.7       | NA        | 2         | 3          | NA        | NA        | NA       |
| Malvaceae      | <i>Scaphium</i>           | <i>macropodum</i>    | 2.6        | 3         | 2         | 8          | 2         | 3         | NA       |
| Malvaceae      | <i>Sterculia</i>          | <i>macrophylla</i>   | 0          | 1         | NA        | NA         | NA        | NA        | NA       |
| Thymelaeaceae  | <i>Gonystylus</i>         | <i>acuminata</i>     | NA         | NA        | NA        | 2          | NA        | NA        | NA       |
| Malvaceae      | <i>Pentace</i>            | <i>corneri</i>       | 0          | 2         | NA        | 3          | 1         | NA        | NA       |
| Malvaceae      | <i>Pentace</i>            | <i>curtisii</i>      | 5.6        | NA        | 1         | 2          | NA        | NA        | NA       |
| Malvaceae      | <i>Pentace</i>            | <i>laxiflora</i>     | 9.3        | 1         | 1         | 2          | NA        | 1         | NA       |
| Verbenaceae    | <i>Teijsmanniodendron</i> | <i>ahernianum</i>    | 0          | 1         | NA        | NA         | NA        | NA        | NA       |
| Verbenaceae    | <i>Teijsmanniodendron</i> | <i>bogoriense</i>    | 4.7        | 1         | 1         | NA         | 1         | NA        | NA       |
| Verbenaceae    | <i>Teijsmanniodendron</i> | <i>glabrum</i>       | 0          | 1         | NA        | 1          | NA        | NA        | NA       |
| Verbenaceae    | <i>Teijsmanniodendron</i> | <i>holophyllum</i>   | 0          | 1         | NA        | 1          | 1         | NA        | NA       |
| Verbenaceae    | <i>Teijsmanniodendron</i> | <i>sarawakanum</i>   | 0          | 1         | NA        | NA         | NA        | NA        | NA       |
| <b>TOTAL</b>   |                           |                      | <b>6.1</b> | <b>84</b> | <b>58</b> | <b>157</b> | <b>55</b> | <b>38</b> | <b>6</b> |

Table S2. Fifteen soil properties measured in topsoil and subsoil in the Central Sarawak drilling and felling data and used to construct soil PC axes, with their range of values observed across sample plots and loadings on the first four PC axes in the principle components analysis (see main text for details). Cumulatively, the first four PCs explained 58 % of the total variance in soil properties, and 29%, 13%, 8%, and 8% were explained separately by PC1, PC2, PC3, and PC4, respectively. Topsoil samples represent the top 10 cm of the soil profile, and subsoil samples were collected from 45-55 cm in depth. The variables with the five largest rotation coefficients for each PC axis are highlighted in bold. Soil concentrations are expressed in units of milliequivalents per 100 g of soil (me%), parts per million (ppm), or percent dry weight (%). CEC = Cation Exchange Capacity.

| Soil Variable      | Units | Soil layer | Range |       | PC Axis Loadings |             |              |              |
|--------------------|-------|------------|-------|-------|------------------|-------------|--------------|--------------|
|                    |       |            | Min   | Max   | PC1              | PC2         | PC3          | PC4          |
| CEC                | me%   | Subsoil    | 1.6   | 17    | 0.17             | 0.2         | 0.23         | 0.1          |
| CEC                | me%   | Topsoil    | 2.03  | 28.79 | 0.09             | 0.12        | <b>0.26</b>  | <b>0.36</b>  |
| Clay               | %     | Subsoil    | 8.8   | 57.5  | <b>0.27</b>      | -0.12       | 0.15         | -0.08        |
| Clay               | %     | Topsoil    | 4.1   | 54.6  | <b>0.27</b>      | -0.15       | 0.12         | -0.06        |
| Fe/Al sesquioxides | %     | Subsoil    | 0.71  | 29.89 | 0.26             | -0.1        | 0.05         | -0.1         |
| Fe/Al sesquioxides | %     | Topsoil    | 0.66  | 21.74 | <b>0.28</b>      | -0.1        | -0.02        | -0.12        |
| Organic Content    | %     | Subsoil    | 0.12  | 6     | 0.08             | -0.14       | -0.08        | 0.18         |
| Organic Content    | %     | Topsoil    | 0.33  | 9.09  | 0.07             | 0.02        | 0.16         | <b>0.49</b>  |
| pH                 |       | Subsoil    | 3.2   | 5.8   | -0.07            | <b>0.37</b> | 0.04         | -0.15        |
| pH                 |       | Topsoil    | 2.9   | 5.8   | -0.03            | <b>0.36</b> | -0.1         | -0.2         |
| Reserve Ca         | ppm   | Subsoil    | 6     | 1296  | 0.21             | -0.07       | -0.15        | 0.01         |
| Reserve Ca         | ppm   | Topsoil    | 1.05  | 2957  | 0.11             | 0.05        | <b>-0.39</b> | 0.11         |
| Reserve K          | ppm   | Subsoil    | 430   | 15294 | 0.25             | 0.01        | 0.11         | <b>-0.29</b> |
| Reserve K          | ppm   | Topsoil    | 95    | 10162 | <b>0.27</b>      | -0.02       | -0.02        | -0.22        |
| Reserve Mg         | ppm   | Subsoil    | 65    | 9882  | 0.19             | <b>0.27</b> | -0.02        | -0.12        |
| Reserve Mg         | ppm   | Topsoil    | 17.92 | 7215  | 0.2              | 0.24        | -0.07        | -0.12        |
| Reserve P          | ppm   | Subsoil    | 32    | 995   | 0.22             | -0.09       | -0.19        | 0.03         |
| Reserve P          | ppm   | Topsoil    | 0.172 | 634   | 0.24             | -0.06       | -0.21        | 0.12         |

|                        |     |         |       |       |             |             |              |             |
|------------------------|-----|---------|-------|-------|-------------|-------------|--------------|-------------|
| <b>Total N</b>         | %   | Subsoil | 0.015 | 0.292 | 0.25        | -0.04       | -0.07        | 0.09        |
| <b>Total N</b>         | %   | Topsoil | 0.025 | 1.26  | 0.17        | 0.01        | 0.14         | <b>0.31</b> |
| <b>Exchangeable Ca</b> | me% | Subsoil | 0.01  | 3.07  | -0.06       | 0.16        | -0.21        | 0.11        |
| <b>Exchangeable Ca</b> | me% | Topsoil | 0.01  | 10.89 | -0.02       | 0.17        | <b>-0.39</b> | 0.15        |
| <b>Exchangeable K</b>  | me% | Subsoil | 0.01  | 0.91  | 0.08        | 0.16        | 0.09         | 0.17        |
| <b>Exchangeable K</b>  | me% | Topsoil | 0.01  | 0.82  | 0.1         | 0.11        | 0.08         | <b>0.33</b> |
| <b>Exchangeable Mg</b> | me% | Subsoil | 0.01  | 1.96  | 0.07        | <b>0.33</b> | -0.18        | 0.02        |
| <b>Exchangeable Mg</b> | me% | Topsoil | 0.01  | 3.59  | 0.1         | <b>0.33</b> | -0.22        | 0.12        |
| <b>Exchangeable Na</b> | me% | Subsoil | 0.01  | 0.27  | 0           | 0.25        | <b>0.32</b>  | -0.09       |
| <b>Exchangeable Na</b> | me% | Topsoil | 0.01  | 0.29  | 0.02        | <b>0.27</b> | <b>0.32</b>  | -0.07       |
| <b>Silt</b>            | %   | Subsoil | 5.9   | 49    | <b>0.27</b> | 0.01        | 0            | -0.07       |
| <b>Silt</b>            | %   | Topsoil | 7.4   | 55.2  | <b>0.28</b> | 0.04        | 0.04         | 0.02        |

Table S3. Comparison of soil geology, taxonomy, and chemistry between Lambir (Baillie et al. 2006) and Central Sarawak (Baillie et al. 1987).

|                 |                      | Lambir                    |                         | Central Sarawak           |                         |
|-----------------|----------------------|---------------------------|-------------------------|---------------------------|-------------------------|
| Parent material | Age                  | Neogene Tertiary          |                         | Paleogene Tertiary        |                         |
|                 | Lithology            | Sandstone                 | Shale                   | Sandstone                 | Shale                   |
| Taxonomy        | World Reference Base | Haplic Acrisol (Arenosol) | Haplic Acrisol (Alisol) | Haplic Acrisol (Arenosol) | Haplic Acrisol (Alisol) |
|                 | Soil Taxonomy        | Typic Palaeudult          | Typic Hapludult         | Typic Palaeudult          | Typic Hapludult         |
|                 | Sarawak soil family  | Nyalau                    | Merit                   | Nyalau                    | Merit                   |
| Topsoil         | Organic C %          | 2                         | 1.2                     | 2.1                       | 2.1                     |
|                 | C:N                  | 14                        | 10                      | 11                        | 9                       |
|                 | Total P ppm          | 91                        | 128                     | 120                       | 269                     |
| Subsoil         | Texture              | Sandy clay loam           | Clay                    | Sandy clay loam           | Clay                    |
|                 | pH                   | 4.7                       | 4.7                     | 4.5                       | 4.6                     |
|                 | Total P ppm          | 78                        | 123                     | 178                       | 233                     |
|                 | Total K ppm          | 2498                      | 4630                    | 3878                      | 5778                    |
|                 | Total Mg ppm         | 796                       | 1667                    | 1232                      | 2563                    |
|                 | Total Ca ppm         | 128                       | 127                     | 176                       | 281                     |

Table S4. The number of trees identified to each taxonomic level of resolution (species, morphospecies, genus, and family) for each stem rot frequency dataset.

| <b>Taxonomic Resolution of Tree ID</b> | <b>Felling</b> | <b>Drilling</b> | <b>Coring</b> |
|----------------------------------------|----------------|-----------------|---------------|
| <b>Species</b>                         | 965            | 1397            | 356           |
| <b>Morpho-species</b>                  | 22             | 24              | 4             |
| <b>Genus</b>                           | 12             | 215             | 5             |
| <b>Family</b>                          | 35             | 142             | 0             |
| <b>Undetermined</b>                    | 1              | 2               | 0             |
| <b>Total</b>                           | <b>1035</b>    | <b>1780</b>     | <b>365</b>    |



Table S5. Fixed effect parameter estimates from the best-supported mixed-effect models predicting the influence of ecological covariates on the frequency and severity of stem rot. Model 1 included: diameter at breast height (DBH), wood density (WD), and soil principle component (PC) axes. Model 2 included: DBH, WD, and soil habitat association. Covariates included in the final models (presented here) were determined by model selection. Estimates are expressed on a logit scale. See the main text for details.

| Response Variable         | Dataset  | Model     | Final Model             | Covariate                    | Estimate | CI: 2.5% | CI: 97.5% |
|---------------------------|----------|-----------|-------------------------|------------------------------|----------|----------|-----------|
| <b>Stem Rot Frequency</b> | Felling  | Model 1   | DBH, Soil PC3           | Intercept                    | -1.687   | -2.333   | -1.040    |
|                           |          |           |                         | DBH                          | 0.036    | 0.025    | 0.048     |
|                           |          |           |                         | Soil PC3                     | 0.152    | 0.007    | 0.297     |
| <b>Stem Rot Frequency</b> | Felling  | Model 2   | DBH x Soil Assoc.       | Clay/FineLoam: Intercept     | -0.896   | -2.688   | 0.896     |
|                           |          |           |                         | Clay/FineLoam x DBH: Slope   | 0.015    | -0.017   | 0.047     |
|                           |          |           |                         | Generalist: Intercept        | -1.977   | -3.444   | -0.510    |
|                           |          |           |                         | Generalist x DBH: Slope      | 0.042    | 0.010    | 0.074     |
|                           |          |           |                         | Loam/Fineloam: Intercept     | -1.160   | -3.011   | 0.690     |
|                           |          |           |                         | Loam/Fineloam x DBH: Slope   | 0.041    | 0.007    | 0.075     |
|                           |          |           |                         | Sandy Loam/Loam: Intercept   | -0.896   | -2.688   | 0.896     |
|                           |          |           |                         | Sandy Loam/Loam x DBH: Slope | 0.092    | 0.042    | 0.143     |
| <b>Stem Rot Frequency</b> | Drilling | Model 1   | DBH, Soil PC2, Soil PC3 | Intercept                    | -2.148   | -2.851   | -1.445    |
|                           |          |           |                         | DBH                          | 0.032    | 0.022    | 0.042     |
|                           |          |           |                         | Soil PC2                     | 0.167    | 0.003    | 0.332     |
|                           |          |           |                         | Soil PC3                     | -0.279   | -0.419   | -0.138    |
| <b>Stem Rot Frequency</b> | Drilling | Model 2   | DBH                     | Intercept                    | -1.993   | -2.696   | -1.290    |
|                           |          |           |                         | DBH                          | 0.029    | 0.019    | 0.039     |
| <b>Stem Rot Frequency</b> | Coring   | Model 1&2 | DBH                     | Intercept                    | -4.755   | -6.059   | -3.452    |
|                           |          |           |                         | DBH                          | 0.072    | 0.044    | 0.099     |
| <b>Stem Rot Severity</b>  | Felling  | Model 1   | No covariates retained  | Intercept                    | 1.951    | 1.720    | 2.182     |
| <b>Stem Rot Severity</b>  | Felling  | Model 2   | WD x Soil Assoc.        | Clay/FineLoam: Intercept     | 1.180    | -2.153   | 4.512     |
|                           |          |           |                         | Clay/FineLoam x WD: Slope    | 0.729    | -3.881   | 5.339     |

|                             |        |        |        |
|-----------------------------|--------|--------|--------|
| Generalist: Intercept       | -2.035 | -5.368 | 1.297  |
| Generalist x WD: Slope      | 5.515  | 0.905  | 10.124 |
| Loam/Fineloam: Intercept    | 3.094  | 0.004  | 6.184  |
| Loam/Fineloam x WD: Slope   | -1.112 | -4.594 | 2.370  |
| Sandy Loam/Loam: Intercept  | 4.306  | 0.578  | 8.035  |
| Sandy Loam/Loam x WD: Slope | -2.765 | -6.892 | 1.363  |

---

Table S6. Variance partitioning coefficients (VPC) for nested taxonomic random effects (Family/Genus/Species) indicating the proportion of variance in stem rot frequency and severity explained by each taxonomic level after accounting for tree size (DBH) as a fixed effect. If the inclusion of a taxonomic level did not improve the model AIC by  $> 2$ , it was not included in the final model, and its absence is denoted by “NA” in the table.

| Taxonomic level            | <u>Stem Rot Frequency</u> |             |             | <u>Stem Rot Severity</u> |
|----------------------------|---------------------------|-------------|-------------|--------------------------|
|                            | Fell                      | Drill       | Core        | Felling                  |
| Family                     | NA                        | NA          | NA          | NA                       |
| Genus                      | 0.09                      | 0.03        | 0.09        | 0.10                     |
| Species                    | 0.08                      | 0.11        | NA          | 0.04                     |
| <b>Total Taxonomic VPC</b> | <b>0.17</b>               | <b>0.14</b> | <b>0.09</b> | <b>0.15</b>              |
| <b>Residual Variance</b>   | 0.83                      | 0.86        | 0.91        | 0.85                     |

Table S7. Model selection based on Akaike's Information Criterion (AIC) for each linear mixed effect model testing the association of DBH, wood density (WD), species soil habitation association (Soil Assoc.) and four soil principle components (PC) with stem rot frequency in the felling, drilling and coring datasets and with stem rot severity in the felling dataset. See the main text for details. Final models denoted with \*\* and boldface font and are presented in further detail in Tables 2, 3, and S6. The full model selection procedure involved comparison of a very large number of models for Models 1 and 2 for each dataset, and so an abridged version is presented here for concision. For models with a given number of predictors, the AIC value of the model with the lowest AIC is given.

| Dataset  | Model          | No. Predictors | Predictors                              | AIC          |
|----------|----------------|----------------|-----------------------------------------|--------------|
| Felling  | Model 1        | 6              | DBH*WD, PC1, PC2, PC3, PC4              | 977          |
|          |                | 5              | DBH, PC1, PC2, PC3, PC4                 | 973          |
|          |                | 4              | DBH, PC2, PC3, PC4                      | 971          |
|          |                | 3              | DBH, PC2, PC3                           | 969          |
|          |                | <b>2</b>       | <b>DBH, PC3</b>                         | <b>970**</b> |
|          |                | 1              | DBH                                     | 972          |
|          |                | 0              | Intercept only                          | 1009         |
| Felling  | Model 2        | 7              | WD*Soil Assoc.*DBH                      | 973          |
|          |                | 6              | WD*Soil Assoc., DBH*WD, DBH*Soil Assoc. | 968          |
|          |                | 5              | WD*DBH, DBH*Soil Assoc.                 | 965          |
|          |                | 4              | WD, DBH*Soil Assoc.                     | 963          |
|          |                | <b>3</b>       | <b>DBH*Soil Assoc.</b>                  | <b>961**</b> |
|          |                | 2              | DBH, Soil Assoc.                        | 970          |
|          |                | 1              | DBH                                     | 972          |
| 0        | Intercept only | 1009           |                                         |              |
| Drilling | Model 1        | 6              | WD*DBH, PC1, PC2, PC3, PC4              | 864          |
|          |                | 5              | DBH, PC1, PC2, PC3, PC4                 | 863          |
|          |                | 4              | DBH, PC2, PC3, PC4                      | 863          |
|          |                | <b>3</b>       | <b>DBH, PC2, PC3</b>                    | <b>863**</b> |
|          |                | 2              | DBH, PC2                                | 865          |
|          |                | 1              | DBH                                     | 876          |
|          |                | 0              | Intercept only                          | 909          |

|                   |                |          |                                         |               |
|-------------------|----------------|----------|-----------------------------------------|---------------|
| Drilling          | Model 2        | 7        | WD*Soil Assoc.*DBH                      | 882           |
|                   |                | 6        | WD*Soil Assoc., DBH*WD, DBH*Soil Assoc. | 884           |
|                   |                | 5        | WD*DBH, DBH*Soil Assoc.                 | 880           |
|                   |                | 4        | WD*DBH, Soil Assoc.                     | 877           |
|                   |                | 3        | WD, DBH, Soil Assoc.                    | 877           |
|                   |                | 2        | DBH, Soil Assoc.                        | 875           |
|                   |                | <b>1</b> | <b>DBH</b>                              | <b>876**</b>  |
|                   |                | 0        | Intercept only                          | 909           |
| Coring            | Model 1        | 7        | WD*Soil Type*DBH                        | 184           |
|                   |                | 6        | WD*Soil Type, DBH*WD, DBH*Soil Type     | 183           |
|                   |                | 5        | DBH*WD, DBH*Soil Type                   | 182           |
|                   |                | 4        | WD*DBH, Soil Type                       | 180           |
|                   |                | 3        | WD*DBH                                  | 180           |
|                   |                | 2        | DBH, Soil Type                          | 180           |
|                   |                | <b>1</b> | <b>DBH</b>                              | <b>180**</b>  |
|                   |                | 0        | Intercept only                          | 216           |
| Coring            | Model 2        | 7        | WD*Soil Assoc.*DBH                      | 190           |
|                   |                | 6        | WD*Soil Assoc., DBH*WD, DBH*Soil Assoc. | 185           |
|                   |                | 5        | WD*Soil Assoc., DBH*WD                  | 182           |
|                   |                | 4        | WD*DBH, Soil Assoc.                     | 182           |
|                   |                | 3        | WD*DBH                                  | 180           |
|                   |                | 2        | WD, DBH                                 | 181           |
|                   |                | <b>1</b> | <b>DBH</b>                              | <b>180**</b>  |
|                   |                | 0        | Intercept only                          | 216           |
| Stem rot severity | Model 1        | 6        | WD*DBH, PC1, PC2, PC3, PC4              | 1671          |
|                   |                | 5        | WD, PC1, PC2, PC3, PC4                  | 1654          |
|                   |                | 4        | WD, PC2, PC3, PC4                       | 1647          |
|                   |                | 3        | WD, PC2, PC3                            | 1641          |
|                   |                | 2        | WD, PC3                                 | 1636          |
|                   |                | 1        | PC3                                     | 1635          |
|                   |                | <b>0</b> | <b>Intercept only</b>                   | <b>1635**</b> |
| Stem rot severity | Model 2        | 7        | WD*Soil Assoc.*DBH                      | 1671          |
|                   |                | 6        | WD*Soil Assoc., DBH*WD, DBH*Soil Assoc. | 1666          |
|                   |                | 5        | WD*Soil Assoc., DBH*WD                  | 1641          |
|                   |                | 4        | WD*Soil Assoc., DBH                     | 1635          |
|                   |                | <b>3</b> | <b>WD*Soil Assoc.</b>                   | <b>1624**</b> |
|                   |                | 2        | WD, Soil Assoc.                         | 1639          |
|                   |                | 1        | WD                                      | 1636          |
| 0                 | Intercept only | 1635     |                                         |               |

Table S8. Goodness of fit of models of stem rot probability and severity as measured by pseudo- $R^2$  ( $pR^2$ ) metrics. The marginal  $pR^2$  is a measure of the proportion of variance in stem rot probability or severity explained by the fixed effects alone, whereas the conditional  $pR^2$  estimates the variance explained by both the fixed and random effects. For all models species was the only random effect.

| <b>Model</b>                       | <b>Marginal <math>pR^2</math></b> | <b>Conditional <math>pR^2</math></b> |
|------------------------------------|-----------------------------------|--------------------------------------|
| <b><i>Stem rot probability</i></b> |                                   |                                      |
| <b>Felling model 1</b>             | 0.08                              | 0.28                                 |
| <b>Felling model 2</b>             | 0.15                              | 0.32                                 |
| <b>Drilling model 1</b>            | 0.10                              | 0.35                                 |
| <b>Drilling model 2</b>            | 0.06                              | 0.38                                 |
| <b>Coring model 1 &amp; 2</b>      | 0.23                              | 0.40                                 |
| <b><i>Stem rot severity</i></b>    |                                   |                                      |
| <b>Felling model 1</b>             | 0.02                              | 0.17                                 |
| <b>Felling model 2</b>             | 0.08                              | 0.18                                 |

Figure S1. Diagram showing the sampling design at plots within clusters, with an example of how the BAF-10 prism is used to determine which trees are classified as in or out of the variable-sized plot, as judged by the prism according to angle subtended by the diameter at breast height (DBH) and the distance from plot centre. Augered soil samples (stars) were 0-50 cm in depth, and the profile pit at the plot center (rectangle) was 55 cm deep. Auger samples were analysed as detailed in the Methods section of the main text for soil properties.

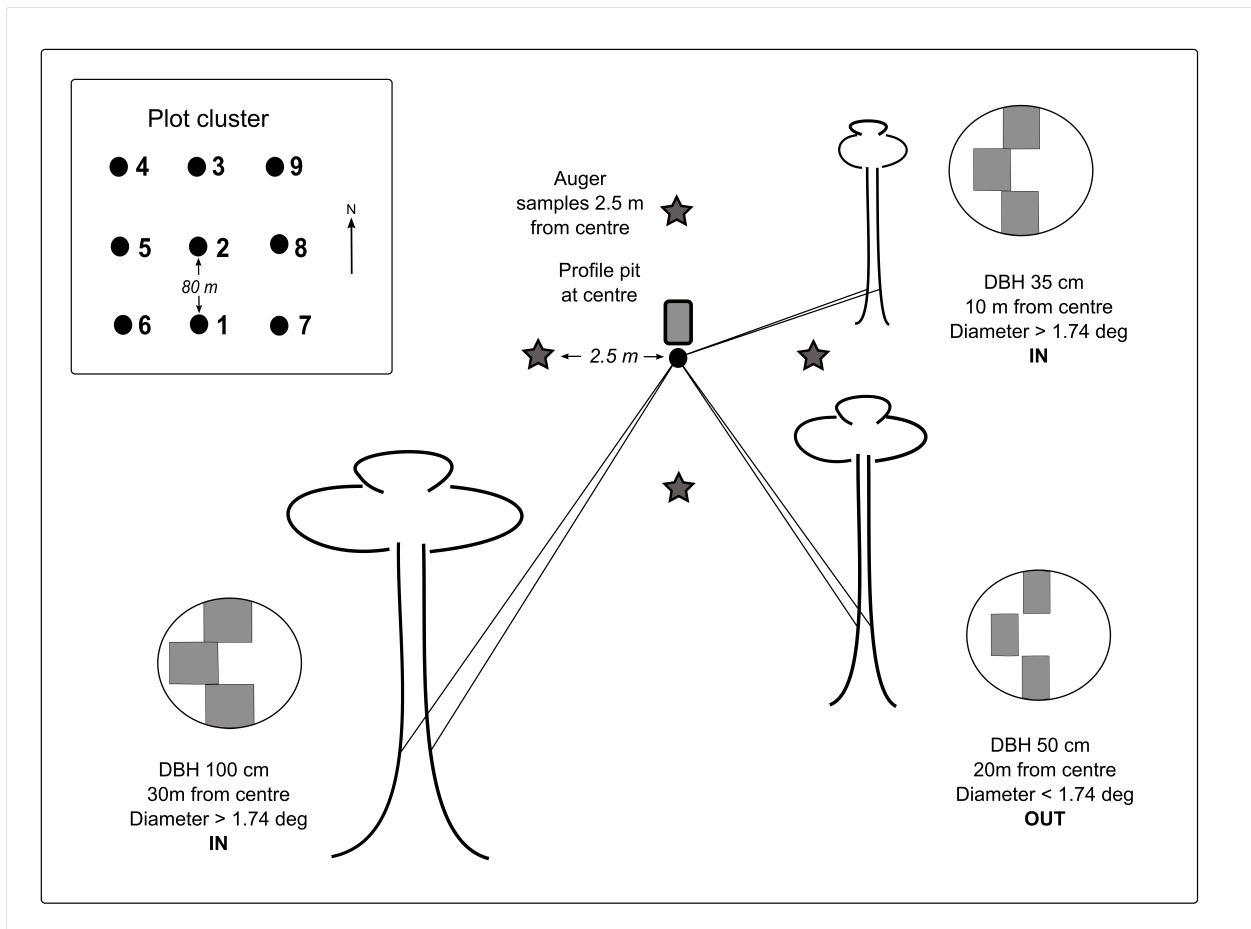

Figure S2. Historical photographs of field workers sampling for stem rot during the Forest Industries Development Project study, producing the Central Sarawak Drilling and Felling datasets. Photographs were taken in 1969 by Peter Sie. Clockwise from the top left, the photographs show felling of a tree, drilling of a tree (top, right), measurement of a log with stem rot (bottom, right), and measurement of a sound log (bottom left).

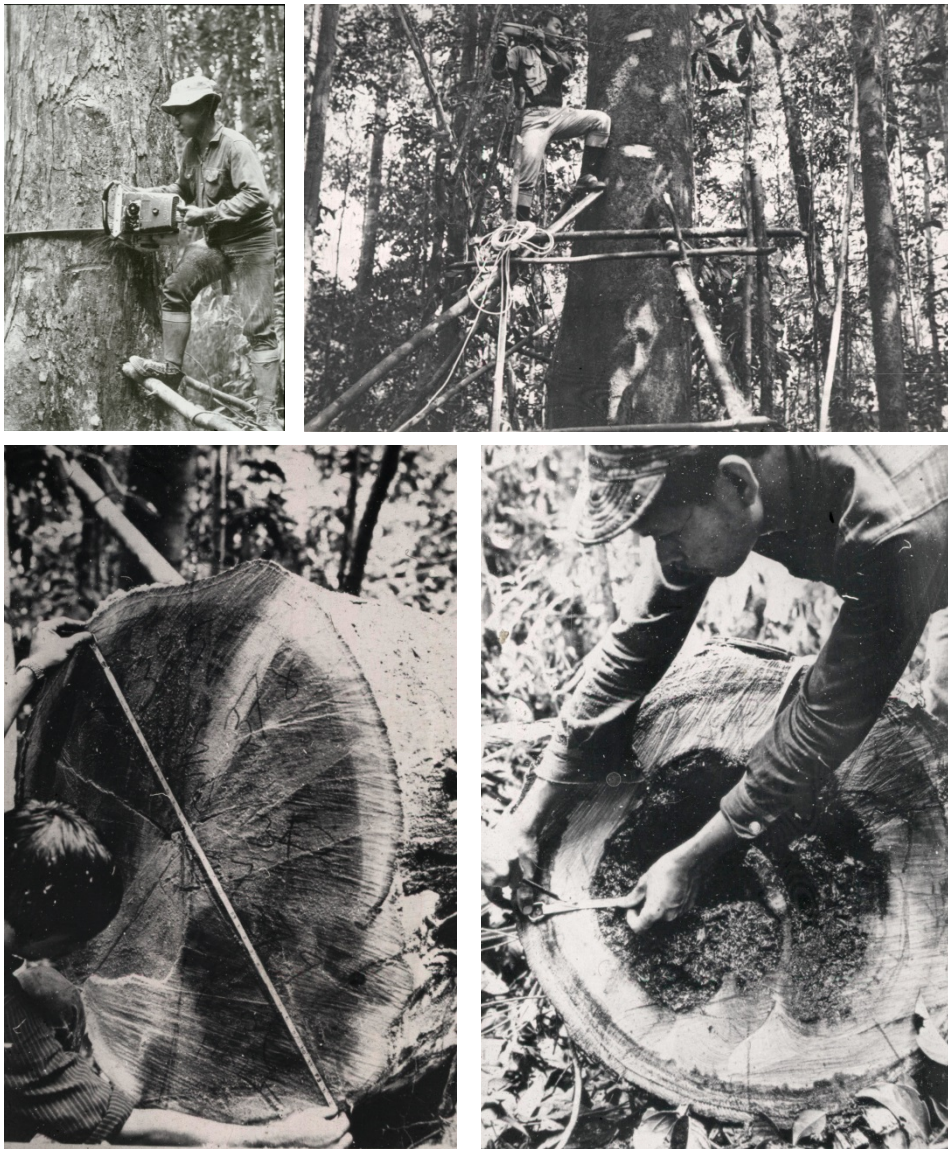



Figure S3. Boxplots showing the distributions of values of the first four soil principal components (PC) for each of 36 clusters included in the analysis of the correlation of stand-level biomass lost to stem rot ( $Loss_{max}$ ) with soil environmental variables.

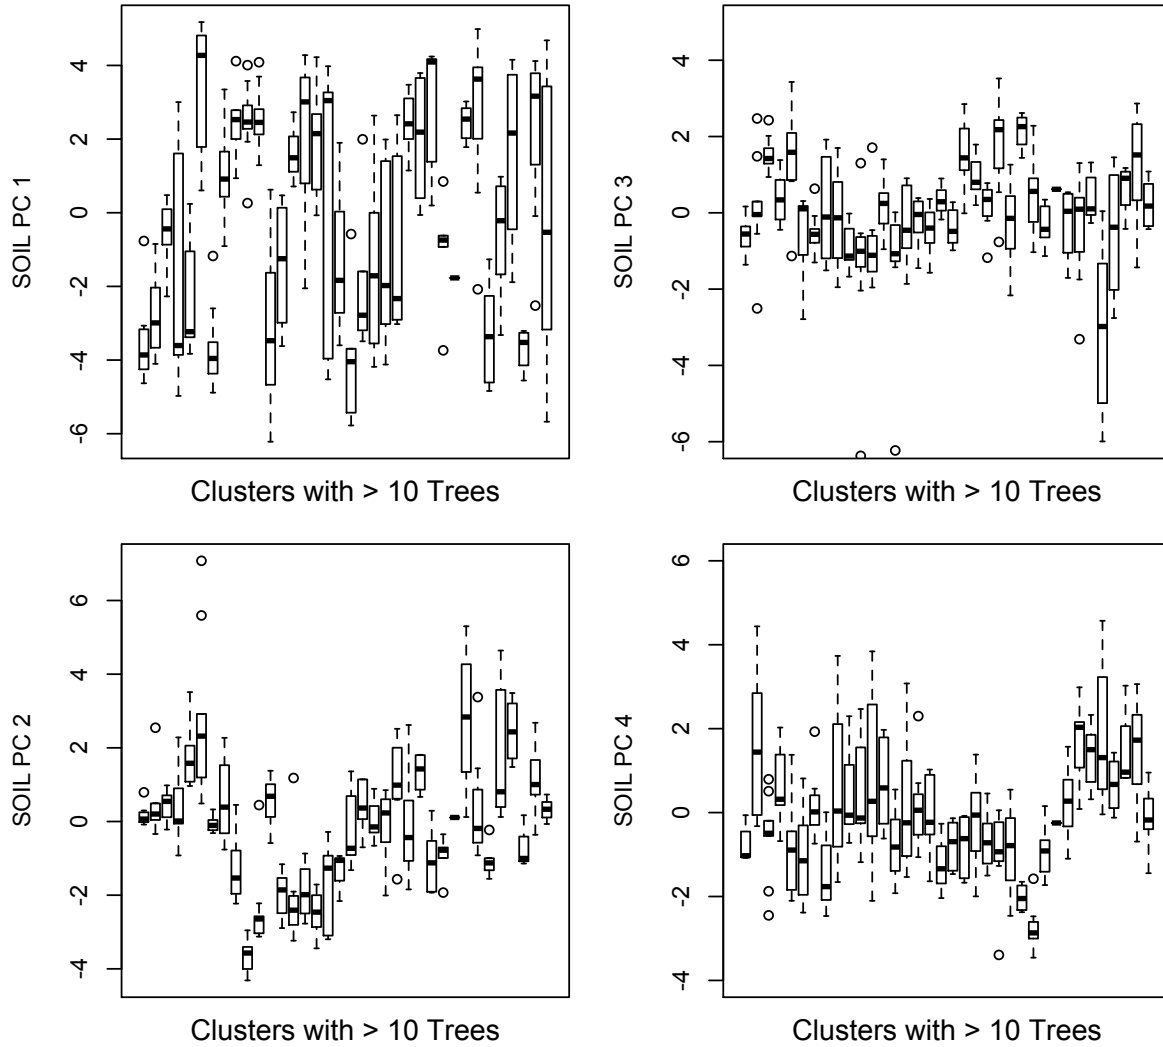

Figure S4. Size distributions of trees evaluated for stem rot presence/absence in the drilling, felling, and coring datasets.

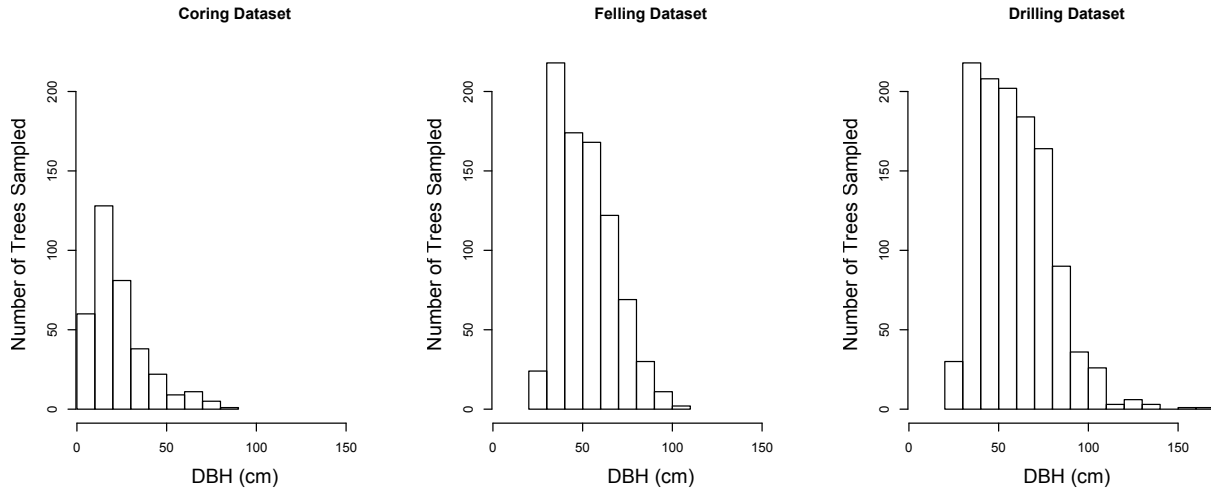

Figure S5. Predicted probability of stem rot as a function of diameter at breast height (DBH) for trees in the coring (purple), drilling (blue), and felling (green) datasets. Points at the top and bottom are a rug plot showing the presence and absence, respectively, of stem rot for each tree at its DBH and are jittered to decrease overlap. See the main text for modelling details. As is the case for all models with a binomial error distribution, there is no error in the prediction of the probability of the response variable based on the linear predictor for each observation, and since DBH is the only continuous fixed-effect in the linear predictor in this generalized linear mixed effects model, the prediction for each tree falls exactly on one curve for each data set.

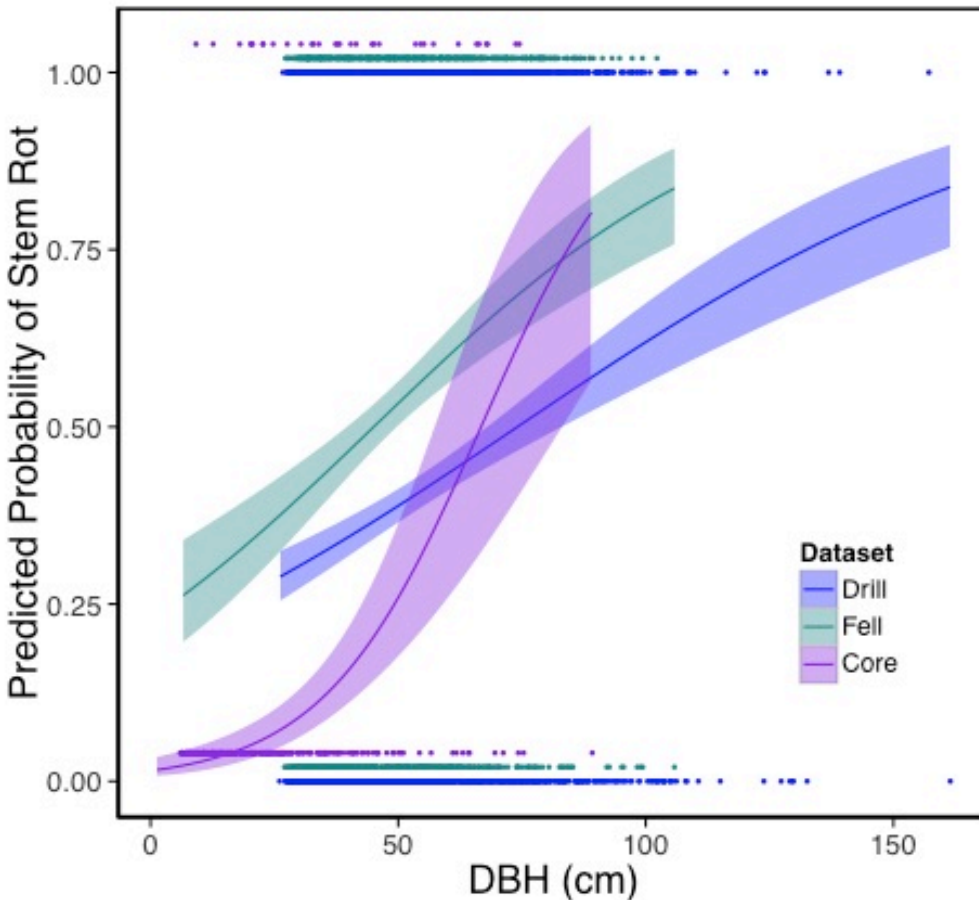

Figure S6. Variation in the predicted probability of stem rot with soil principle component two (PC2) and principle component three (PC3) in the Central Sarawak drilling (A, B) and felling (C, D) datasets. Circles are predicted values of stem rot probability based on model 1 and are scaled with tree diameter at breast height (DBH). Ticks at the top and bottom are a rug plot showing the presence and absence, respectively, of stem rot for each tree at its soil PC value and are jittered to decrease overlap. The curve shows the predicted relationship between stem rot probability and soil PCs with all other predictor variables held at their mean values. Dotted lines represent upper and lower 95% confidence limits. See the main text for modelling details.

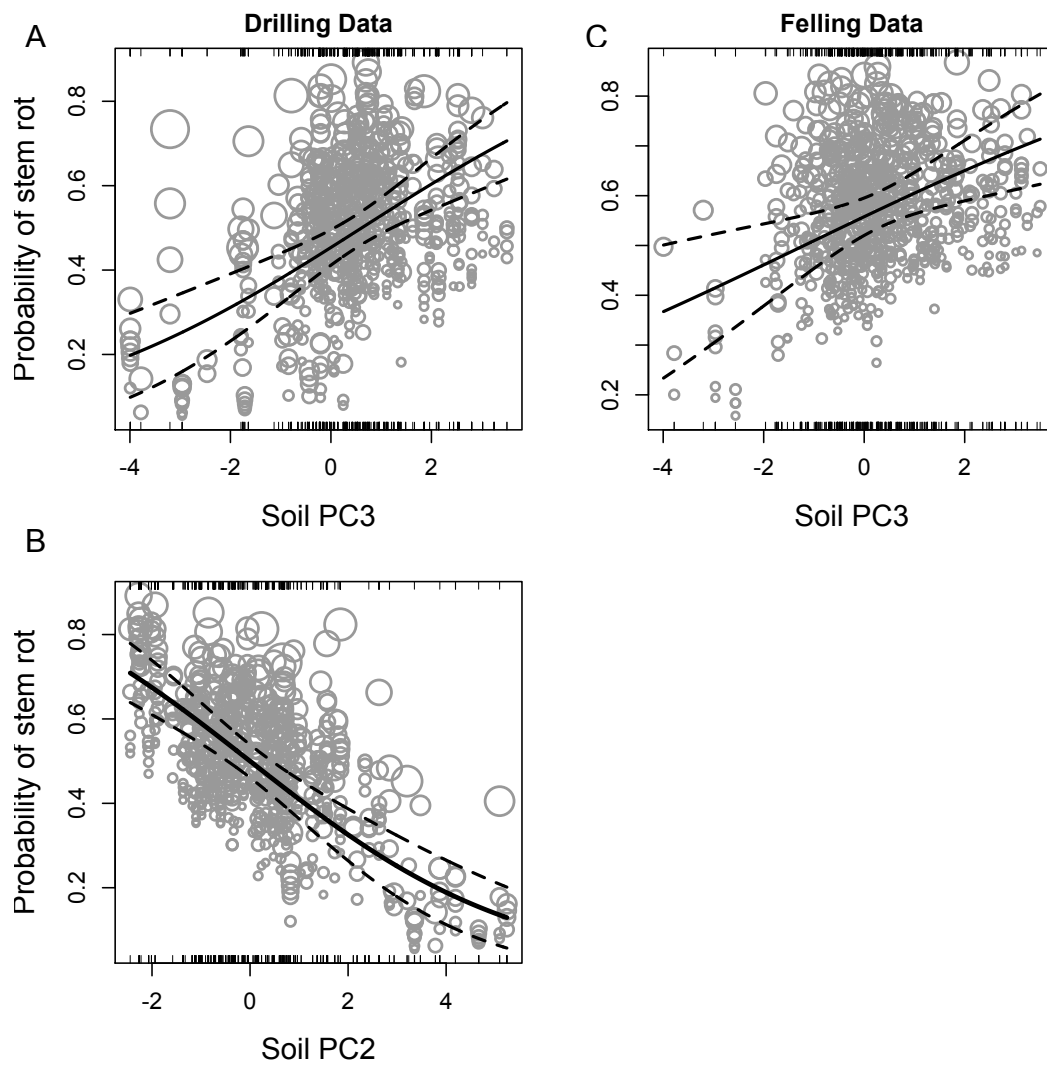

Figure S7. Predicted probability of stem rot as a function of DBH for species in four soil habitat association groups (represented by different colors, see figure legend) for model 2 in the felling dataset. Shaded regions correspond to 95% confidence envelopes. Points at the top and bottom are a rug plot showing the presence and absence, respectively, of stem rot for each tree at its DBH and are jittered to decrease overlap.

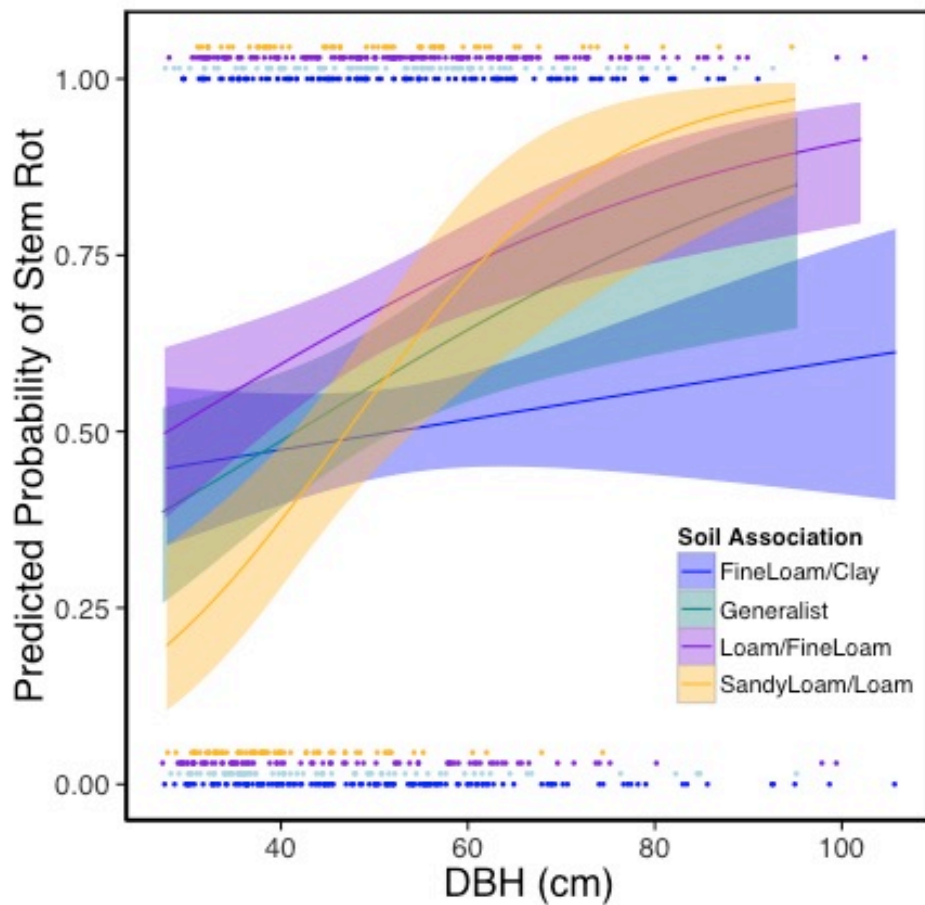

Supplement: Supplementary file 1 [file bg-12-5735-2015-supplement.pdf]
